# Supplementary material
Source: HighWire-hosted journal article supplement (https://spcare.bmj.com/content/spcare-2023-004495)
Supplement: inline-supplementary-material-1 [file inline-supplementary-material-1.pdf]

## Supplementary file 1: Description of the digital PCP

| <b>Palliative Care Pathway</b>                                                  | Yes                                                          | No                                                                                  |                                                                                                                                    |                                                                                           |                                                                                           |               |
|---------------------------------------------------------------------------------|--------------------------------------------------------------|-------------------------------------------------------------------------------------|------------------------------------------------------------------------------------------------------------------------------------|-------------------------------------------------------------------------------------------|-------------------------------------------------------------------------------------------|---------------|
| Button web link Pallialine.nl                                                   |                                                              |                                                                                     |                                                                                                                                    |                                                                                           |                                                                                           |               |
|                                                                                 |                                                              |                                                                                     |                                                                                                                                    |                                                                                           |                                                                                           |               |
| <b>General</b>                                                                  |                                                              |                                                                                     |                                                                                                                                    |                                                                                           |                                                                                           |               |
| Start date PCP                                                                  | Open text box                                                |                                                                                     |                                                                                                                                    |                                                                                           |                                                                                           |               |
| Name physician who started the PCP                                              | Open text box                                                |                                                                                     |                                                                                                                                    |                                                                                           |                                                                                           |               |
| Diagnosis                                                                       | ICD10 list                                                   |                                                                                     |                                                                                                                                    |                                                                                           |                                                                                           |               |
| Explanation diagnosis which led to starting the PCP                             | Open text box                                                |                                                                                     |                                                                                                                                    |                                                                                           |                                                                                           |               |
| Prognosis                                                                       | Progressive (> months)                                       |                                                                                     | Progressive deterioration (weeks)                                                                                                  |                                                                                           | Dying phase (days)                                                                        |               |
| Criteria for entering palliative phase                                          | Progressive disease                                          | Deteriorating patient's condition                                                   | Severe complication of a medical treatment                                                                                         | No more anticancer treatment options available                                            | Patients' wish to stop all medical treatments.                                            |               |
| WHO score                                                                       | 0: Able to carry out all normal activity without restriction | 1: Restricted in strenuous activity but ambulatory and able to carry out light work | 2: Ambulatory and capable of all self-care but unable to carry out any work activities; up and about more than 50% of waking hours | 3: Symptomatic and in a chair or in bed for greater than 50% of the day but not bedridden | 4: Completely disabled; cannot carry out any self-care; totally confined to bed or chair. |               |
| Button ESAS in electronic health record <sup>a</sup>                            |                                                              |                                                                                     |                                                                                                                                    |                                                                                           |                                                                                           |               |
| Button to add the patient to the multidisciplinary PCP meeting list             |                                                              |                                                                                     |                                                                                                                                    |                                                                                           |                                                                                           |               |
| Button to send notification to spiritual care                                   |                                                              |                                                                                     |                                                                                                                                    |                                                                                           |                                                                                           |               |
|                                                                                 |                                                              |                                                                                     |                                                                                                                                    |                                                                                           |                                                                                           |               |
| <b>End-of-Life discussion</b>                                                   |                                                              |                                                                                     |                                                                                                                                    |                                                                                           |                                                                                           |               |
| Is patient competent?                                                           | Yes                                                          | No                                                                                  |                                                                                                                                    |                                                                                           |                                                                                           |               |
| Present at discussion                                                           | Relative(s)                                                  | Nurse(s)                                                                            | Open text box                                                                                                                      |                                                                                           |                                                                                           |               |
| Role of attending relatives                                                     | Partner                                                      | Child(ren)                                                                          | Parent(s)                                                                                                                          | Brother(s) / sister(s)                                                                    | Friend(s) / neighbour(s)                                                                  | Open text box |
| Name attending relatives                                                        | Open text box                                                |                                                                                     |                                                                                                                                    |                                                                                           |                                                                                           |               |
| Button web link RDMA brochure end-of-life discussion <sup>b</sup>               |                                                              |                                                                                     |                                                                                                                                    |                                                                                           |                                                                                           |               |
| Button to the Hospital documentation system: manual about bad-news conversation |                                                              |                                                                                     |                                                                                                                                    |                                                                                           |                                                                                           |               |
| Description of the conversation about disease trajectory                        | Open text box                                                |                                                                                     |                                                                                                                                    |                                                                                           |                                                                                           |               |
| Description of patient's concerns                                               | Open text box                                                |                                                                                     |                                                                                                                                    |                                                                                           |                                                                                           |               |

|                                                                                                                                                                                                             |                                                                                                                           |                       |                                                                                                                          |         |  |  |
|-------------------------------------------------------------------------------------------------------------------------------------------------------------------------------------------------------------|---------------------------------------------------------------------------------------------------------------------------|-----------------------|--------------------------------------------------------------------------------------------------------------------------|---------|--|--|
|                                                                                                                                                                                                             |                                                                                                                           |                       |                                                                                                                          |         |  |  |
| <b>Treatment restrictions</b>                                                                                                                                                                               | Any treatment restrictions are shown here. Double-click the most recent one to edit. Click the plus sign to add a new one |                       |                                                                                                                          |         |  |  |
| Treatment restriction/will statement:                                                                                                                                                                       | Open text box to document the discussion with patient and relatives                                                       |                       |                                                                                                                          |         |  |  |
| Description of patient values and preferences for the time ahead                                                                                                                                            | Open text box                                                                                                             |                       |                                                                                                                          |         |  |  |
| Description of relatives values and preferences for the time ahead                                                                                                                                          | Open text box                                                                                                             |                       |                                                                                                                          |         |  |  |
| Preference of patient and relatives regarding out-of-hospital stay                                                                                                                                          | Home                                                                                                                      | Nursing home          | Palliative care unit or hospice                                                                                          |         |  |  |
|                                                                                                                                                                                                             |                                                                                                                           |                       |                                                                                                                          |         |  |  |
| <b>Actions following start of PCP</b>                                                                                                                                                                       |                                                                                                                           |                       |                                                                                                                          |         |  |  |
| Adjusting medication                                                                                                                                                                                        | Yes                                                                                                                       | No                    | After selecting 'yes', the medication overview appears in which medication can be adjusted                               |         |  |  |
| Adjusting outpatient visits to the hospital and/or appointments for diagnostics or medical interventions                                                                                                    | Yes                                                                                                                       | No                    | Only what needs to be adjusted can be indicated here, which will then have to be adjusted by outpatient clinic employees |         |  |  |
| Informing other care givers who are involved in the care of the patient?                                                                                                                                    | Yes                                                                                                                       | No                    | If yes, note here which doctor is informed and in which manner                                                           |         |  |  |
| Contact with the general practitioner?                                                                                                                                                                      | Yes                                                                                                                       | Still to be scheduled | Not being able to get in touch                                                                                           | No need |  |  |
| Button consultation Palliative Care Team                                                                                                                                                                    |                                                                                                                           |                       |                                                                                                                          |         |  |  |
| Follow-up discussion following this end-of-life discussion                                                                                                                                                  | Tick box when follow-up discussion is needed. Then schedule a follow-up discussion                                        |                       |                                                                                                                          |         |  |  |
| Information leaflet about palliative care handed out                                                                                                                                                        | Tick box when handed out                                                                                                  |                       |                                                                                                                          |         |  |  |
| Button consultation paramedical professionals and aftercare office <sup>c</sup>                                                                                                                             | List of categories, is displayed only for admitted patients.                                                              |                       |                                                                                                                          |         |  |  |
| <sup>a</sup> ESAS: Edmonton Symptom Assessment System<br><sup>b</sup> RDMA: Royal Dutch Medical Association<br><sup>c</sup> The aftercare office arranges all the care patients need after hospitalisation. |                                                                                                                           |                       |                                                                                                                          |         |  |  |
