# Supplementary material
Source: HighWire-hosted journal article supplement (https://spcare.bmj.com/content/spcare-2023-004495)
Supplement: inline-supplementary-material-2 [file inline-supplementary-material-2.pdf]

## Supplementary file 2: Questionnaire Quality of Care - PCP

|   | General                                                                                                                                                                                                                                                                                                                                                                             | Ref.nr.<br><input type="text"/> <input type="text"/> <input type="text"/>                                                                    |
|---|-------------------------------------------------------------------------------------------------------------------------------------------------------------------------------------------------------------------------------------------------------------------------------------------------------------------------------------------------------------------------------------|----------------------------------------------------------------------------------------------------------------------------------------------|
| 1 | <b>Date of birth of your loved one?</b><br><input type="text"/> <input type="text"/> day <input type="text"/> <input type="text"/> month <input type="text"/> <input type="text"/> <input type="text"/> <input type="text"/> year                                                                                                                                                   |                                                                                                                                              |
| 2 | <b>When did your loved one die?</b><br><input type="text"/> <input type="text"/> day <input type="text"/> <input type="text"/> month <input type="text"/> <input type="text"/> <input type="text"/> <input type="text"/> year                                                                                                                                                       |                                                                                                                                              |
| 3 | <b>What was his/her nationality?</b><br><input type="checkbox"/> Dutch<br><input type="checkbox"/> other, namely                                                                                                                                                                                                                                                                    | <input type="text"/>                                                                                                                         |
| 4 | <b>What was his/ her marital status?</b><br><input type="checkbox"/> married or living together<br><input type="checkbox"/> widow<br><input type="checkbox"/> divorced<br><input type="checkbox"/> single<br><input type="checkbox"/> other, namely                                                                                                                                 | <input type="text"/>                                                                                                                         |
| 5 | <b>Did your loved one had children?</b><br><input type="checkbox"/> yes<br><input type="checkbox"/> no                                                                                                                                                                                                                                                                              |                                                                                                                                              |
| 6 | <b>What age is this child or these children?</b><br><i>(you can tick multiple boxes)</i><br><input type="checkbox"/> 0-12 year                      number of children in this age:<br><input type="checkbox"/> 13-18 year                      number of children in this age:<br><input type="checkbox"/> 19 years and older                      number of children in this age: | <input type="text"/><br><input type="text"/><br><input type="text"/>                                                                         |
| 7 | <b>How was your loved one's living situation?</b><br><input type="checkbox"/> single-housing<br><input type="checkbox"/> with partner<br><input type="checkbox"/> with partner and child / children                                                                                                                                                                                 | <input type="checkbox"/> without partner, with child / children<br><input type="checkbox"/> with parent(s)<br><input type="checkbox"/> other |
| 8 | <b>What was his/her highest completed level of education?</b><br><input type="checkbox"/> primary education<br><input type="checkbox"/> lower secondary education<br><input type="checkbox"/> upper secondary education<br><input type="checkbox"/> post-secondary non-tertiary education                                                                                           | <input type="checkbox"/> short-cycle tertiary education<br><input type="checkbox"/> bachelor or equivalent<br><input type="checkbox"/> other |

|           |                                                                                                                                                                                                                                                                                                                                                                                                                                   |
|-----------|-----------------------------------------------------------------------------------------------------------------------------------------------------------------------------------------------------------------------------------------------------------------------------------------------------------------------------------------------------------------------------------------------------------------------------------|
| <b>9</b>  | <p><b>Was your loved one religious or did he/she have a certain philosophy/religion of life?</b></p> <p><input type="checkbox"/> yes</p> <p><input type="checkbox"/> no</p> <p><input type="checkbox"/> don't know</p>                                                                                                                                                                                                            |
| <b>10</b> | <p><b>Which philosophy/religion?</b></p> <p><input type="checkbox"/> Catholic</p> <p><input type="checkbox"/> Protestant</p> <p><input type="checkbox"/> Islamic</p> <p><input type="checkbox"/> Buddhist</p> <p><input type="checkbox"/> Hindu</p> <p><input type="checkbox"/> don't know</p> <p><input type="checkbox"/> other</p> <div style="border: 1px solid black; width: 350px; height: 20px; margin-left: 400px;"></div> |
| <b>11</b> | <p><b>What kind of relation did you have with your loved one?</b></p> <p><input type="checkbox"/> partner</p> <p><input type="checkbox"/> mother</p> <p><input type="checkbox"/> father</p> <p><input type="checkbox"/> child</p> <p><input type="checkbox"/> other</p> <div style="border: 1px solid black; width: 350px; height: 20px; margin-left: 400px;"></div>                                                              |
| <b>12</b> | <p><b>What is your age?</b></p> <p><input type="text"/> <input type="text"/> year</p>                                                                                                                                                                                                                                                                                                                                             |
| <b>13</b> | <p><b>Are you a woman or a man?</b></p> <p><input type="checkbox"/> man</p> <p><input type="checkbox"/> woman</p>                                                                                                                                                                                                                                                                                                                 |
| <b>14</b> | <p><b>How is your health in general?</b></p> <p><input type="checkbox"/> very good</p> <p><input type="checkbox"/> good</p> <p><input type="checkbox"/> average</p> <p><input type="checkbox"/> good days / bad days</p> <p><input type="checkbox"/> bad</p>                                                                                                                                                                      |

|           |                                                                                                                                                                                                                                   |
|-----------|-----------------------------------------------------------------------------------------------------------------------------------------------------------------------------------------------------------------------------------|
|           | <p><b>The following questions are concerned with information that the health professionals may have given you and..... about his/ her illness, and about any anxiety or depression he/she may have had</b></p>                    |
| <b>15</b> | <p><b>During his/her last three months, did..... suffer from anxiety and/or nerves or get depressed? Please tick one box</b></p> <p><input type="checkbox"/> yes, most of the time</p> <p><input type="checkbox"/> yes, often</p> |

|    |                                                                                                                                                                                                                                                                                                                                                                                                                                                                                                                                                                                                                                                                                          |
|----|------------------------------------------------------------------------------------------------------------------------------------------------------------------------------------------------------------------------------------------------------------------------------------------------------------------------------------------------------------------------------------------------------------------------------------------------------------------------------------------------------------------------------------------------------------------------------------------------------------------------------------------------------------------------------------------|
|    | <input type="checkbox"/> yes, sometimes<br><input type="checkbox"/> rarely<br><input type="checkbox"/> never<br><hr/> <p><b>b) If Yes: Did he/she get any help to cope with these problems?</b></p> <input type="checkbox"/> yes <input type="checkbox"/> no <input type="checkbox"/> help was not necessary<br><hr/> <p><b>c) If yes, did they help relieve the anxiety, nerves or depression?</b></p> <input type="checkbox"/> yes, most of the time<br><input type="checkbox"/> yes, often<br><input type="checkbox"/> yes, sometimes<br><input type="checkbox"/> rarely<br><input type="checkbox"/> never<br><p><b>Please comment if you would like to:</b> <input type="text"/></p> |
| 16 | <p><b>a) During .....’s illness or incapacity were you able to find out all you wanted to know about his or her illness and how it was likely to affect him / her?</b></p> <input type="checkbox"/> yes <input type="checkbox"/> no<br><hr/> <p><b>b) Was there anything else you would like to have been explained to you in more detail?</b></p> <input type="checkbox"/> yes <input type="checkbox"/> no<br><p><b>If yes, please say which things you would liked to have known more about:</b></p> <input type="text"/>                                                                                                                                                              |
| 17 | <p><b>How involved were you with the decisions made about..... ’s care?</b></p> <input type="checkbox"/> very involved<br><input type="checkbox"/> fairly involved<br><input type="checkbox"/> not involved<br><input type="checkbox"/> don’t know                                                                                                                                                                                                                                                                                                                                                                                                                                       |
| 18 | <p><b>Were you satisfied with your involvement?</b></p> <input type="checkbox"/> no, I wished to be more involved<br><input type="checkbox"/> no, I wished to be less involved<br><input type="checkbox"/> yes<br><input type="checkbox"/> don’t know                                                                                                                                                                                                                                                                                                                                                                                                                                    |
| 19 | <p><b>Were you told he/she was likely to die?</b></p> <input type="checkbox"/> yes <input type="checkbox"/> no<br><p><b>If yes, were you satisfied with the way you were told?</b></p> <input type="checkbox"/> yes <input type="checkbox"/> no                                                                                                                                                                                                                                                                                                                                                                                                                                          |

|  |                                                                                                                                                                                                                                                                                                                                                                                       |
|--|---------------------------------------------------------------------------------------------------------------------------------------------------------------------------------------------------------------------------------------------------------------------------------------------------------------------------------------------------------------------------------------|
|  | <p><b>Please comment if you would like to:</b></p> <div style="border: 1px solid black; height: 25px; width: 100%;"></div> <p><b>If no, would you have liked to have been told?</b></p> <p><input type="checkbox"/> yes    <input type="checkbox"/> no</p> <p><b>Please comment if you would like to:</b></p> <div style="border: 1px solid black; height: 25px; width: 100%;"></div> |
|--|---------------------------------------------------------------------------------------------------------------------------------------------------------------------------------------------------------------------------------------------------------------------------------------------------------------------------------------------------------------------------------------|

|           |                                                                                                                                                                                                                                                                                                                                                                                                                                                                                                                                                                                                                         |
|-----------|-------------------------------------------------------------------------------------------------------------------------------------------------------------------------------------------------------------------------------------------------------------------------------------------------------------------------------------------------------------------------------------------------------------------------------------------------------------------------------------------------------------------------------------------------------------------------------------------------------------------------|
|           | <p><b>The following questions are about the circumstances surrounding .....’s death, and your feelings about the way in which the health and social services treated you and..... at that time.</b></p>                                                                                                                                                                                                                                                                                                                                                                                                                 |
| <b>20</b> | <p><b>Where did..... die?</b></p> <p><input type="checkbox"/> his/her own home</p> <p><input type="checkbox"/> your homes</p> <p><input type="checkbox"/> hospital</p> <p><input type="checkbox"/> hospice</p> <p><input type="checkbox"/> old people’s home / nursing home</p> <p><input type="checkbox"/> on the way to hospital</p> <p><input type="checkbox"/> on the way to hospice</p> <p><input type="checkbox"/> other (please explain) <span style="float: right; border: 1px solid black; padding: 2px 20px;"></span></p>                                                                                     |
| <b>21</b> | <p><b>a) Did..... ever say that there was a place where he/she would like to die?</b></p> <p><input type="checkbox"/> yes</p> <p><input type="checkbox"/> no</p> <p><input type="checkbox"/> don’t know</p> <p>_____</p> <p><b>b) If yes, where was the place?</b></p> <p><input type="checkbox"/> at home</p> <p><input type="checkbox"/> In an old people’s home / nursing home</p> <p><input type="checkbox"/> In a hospice</p> <p><input type="checkbox"/> In a hospital</p> <p><input type="checkbox"/> other (please explain) <span style="float: right; border: 1px solid black; padding: 2px 20px;"></span></p> |

|           |                                                                                                                                                                                                                                                                                                                                                                                                                                                                                                                                                                                                                                                                                                                                                                                                                                                                                                                                                                                                                                    |
|-----------|------------------------------------------------------------------------------------------------------------------------------------------------------------------------------------------------------------------------------------------------------------------------------------------------------------------------------------------------------------------------------------------------------------------------------------------------------------------------------------------------------------------------------------------------------------------------------------------------------------------------------------------------------------------------------------------------------------------------------------------------------------------------------------------------------------------------------------------------------------------------------------------------------------------------------------------------------------------------------------------------------------------------------------|
| <b>22</b> | <p><b>Did he/she died in the place he/she wanted to die in?</b></p> <p><input type="checkbox"/> yes</p> <p><input type="checkbox"/> no</p> <p><input type="checkbox"/> don't know</p> <p><b>If no, what was the reason for that? Please tick one box only</b></p> <p><input type="checkbox"/> he/she changed his mind</p> <p><input type="checkbox"/> there was insufficient help for him/her to stay at home</p> <p><input type="checkbox"/> the family/carers were too tired to continue looking after him/her at home</p> <p><input type="checkbox"/> the staff at the old peoples/nursing home were no longer able to look after him/her</p> <p><input type="checkbox"/> he/she could no longer afford to stay there</p> <p><input type="checkbox"/> he / she deteriorated and dies so quickly that there wasn't time for him/her to be moved</p> <p><input type="checkbox"/> there were no beds available</p> <p><input type="checkbox"/> other (please explain) <input style="width: 150px; height: 15px;" type="text"/></p> |
| <b>23</b> | <p><b>On balance. Do you feel that where he dies was the right place for him or not?</b></p> <p><input type="checkbox"/> Yes, it was the right place</p> <p><input type="checkbox"/> No, it wasn't the right place</p> <p><input type="checkbox"/> Not sure</p> <p><b>If no, was it because</b></p> <p><input type="checkbox"/> It wasn't where he/ she wanted to die</p> <p><input type="checkbox"/> The care he / she received there was poor</p> <p><input type="checkbox"/> It was too far away from family and friends</p> <p><input type="checkbox"/> Other (please explain) <input style="width: 150px; height: 15px;" type="text"/></p>                                                                                                                                                                                                                                                                                                                                                                                    |
| <b>24</b> | <p><b>Is there any other help or support you would have liked from the health and/or social services since his/her death?</b></p> <p><input type="checkbox"/> yes      <input type="checkbox"/> no</p> <p><b>If yes, please comment on what you feel would have helped</b></p> <p><input style="width: 150px; height: 20px;" type="text"/></p>                                                                                                                                                                                                                                                                                                                                                                                                                                                                                                                                                                                                                                                                                     |

|                                           |                                                                                                                                                                                                                                                                                                                                                                                |
|-------------------------------------------|--------------------------------------------------------------------------------------------------------------------------------------------------------------------------------------------------------------------------------------------------------------------------------------------------------------------------------------------------------------------------------|
| <b>Shared decision-making End-of-life</b> |                                                                                                                                                                                                                                                                                                                                                                                |
| <b>25</b>                                 | <p><b>Was your loved one told he/she had an incurable illness?</b></p> <p><input type="checkbox"/> Yes, by a medical specialist</p> <p><input type="checkbox"/> Yes by a ward physician</p> <p><input type="checkbox"/> Yes, by a family doctor or physician in a nursing home</p> <p><input type="checkbox"/> Yes, all above mentioned</p> <p><input type="checkbox"/> no</p> |
| <b>26</b>                                 | <p><b>Were you present during this message/discussion?</b></p> <p><input type="checkbox"/> yes</p> <p><input type="checkbox"/> no</p> <p><input type="checkbox"/> other <input style="width: 150px; height: 15px;" type="text"/></p>                                                                                                                                           |

|    |                                                                                                                                                                                                                                                                                                                                                                                                                                                                                                                                                                                                                                                                                                                                                                                                                                                                                                                                                                       |
|----|-----------------------------------------------------------------------------------------------------------------------------------------------------------------------------------------------------------------------------------------------------------------------------------------------------------------------------------------------------------------------------------------------------------------------------------------------------------------------------------------------------------------------------------------------------------------------------------------------------------------------------------------------------------------------------------------------------------------------------------------------------------------------------------------------------------------------------------------------------------------------------------------------------------------------------------------------------------------------|
| 27 | <p><b>How long before death of your loved one's death was told about this incurable illness?</b></p> <p><input type="checkbox"/> More than 12 months before death</p> <p><input type="checkbox"/> 3-12 months before death</p> <p><input type="checkbox"/> 1 week – 3 months before death</p> <p><input type="checkbox"/> Less than a week before death</p>                                                                                                                                                                                                                                                                                                                                                                                                                                                                                                                                                                                                           |
| 28 | <p><b>When this message was told to your loved one and/or you, were you given the opportunity to talk about it?</b></p> <p><input type="checkbox"/> yes</p> <p><input type="checkbox"/> no</p> <p><input type="checkbox"/> don't know</p> <p>Please comment if you would like to: <input type="text"/></p>                                                                                                                                                                                                                                                                                                                                                                                                                                                                                                                                                                                                                                                            |
| 29 | <p><b>Before his/her death, did your loved one discuss with someone his/her preferences for end-of-life medical treatment? (You can tick multiple boxes)</b></p> <p><input type="checkbox"/> yes, with:</p> <p style="padding-left: 40px;"><input type="checkbox"/> partner</p> <p style="padding-left: 40px;"><input type="checkbox"/> children</p> <p style="padding-left: 40px;"><input type="checkbox"/> other family members</p> <p style="padding-left: 40px;"><input type="checkbox"/> friends</p> <p style="padding-left: 40px;"><input type="checkbox"/> family doctor</p> <p style="padding-left: 40px;"><input type="checkbox"/> medical specialist</p> <p style="padding-left: 40px;"><input type="checkbox"/> physician in a nursing home</p> <p style="padding-left: 40px;"><input type="checkbox"/> nurse</p> <p style="padding-left: 40px;"><input type="checkbox"/> somebody else</p> <p><input type="checkbox"/> no</p> <p><input type="text"/></p> |
| 30 | <p><b>If yes, do you know which preferences were discussed?</b></p> <p><input type="checkbox"/> yes</p> <p><input type="checkbox"/> no</p> <p>If yes, such as: <input type="text"/></p>                                                                                                                                                                                                                                                                                                                                                                                                                                                                                                                                                                                                                                                                                                                                                                               |
| 31 | <p><b>Did they fulfill these preferences?</b></p> <p><input type="checkbox"/> yes</p> <p><input type="checkbox"/> no</p> <p>If no, please explain: <input type="text"/></p>                                                                                                                                                                                                                                                                                                                                                                                                                                                                                                                                                                                                                                                                                                                                                                                           |
| 32 | <p><b>Do you think if your loved one had needed more discussions regarding his or her preferences for end-of-life medical treatment?</b></p> <p><input type="checkbox"/> yes</p> <p><input type="checkbox"/> no</p> <p><input type="checkbox"/> don't know</p>                                                                                                                                                                                                                                                                                                                                                                                                                                                                                                                                                                                                                                                                                                        |
| 33 | <p><b>If yes, do you know about which preferences your loved one wanted to discuss?</b></p> <p><input type="checkbox"/> yes</p> <p><input type="checkbox"/> no</p> <p><input type="text"/></p>                                                                                                                                                                                                                                                                                                                                                                                                                                                                                                                                                                                                                                                                                                                                                                        |

|           |                                                                                                                                                                                                                                                                                                                                                                                                            |
|-----------|------------------------------------------------------------------------------------------------------------------------------------------------------------------------------------------------------------------------------------------------------------------------------------------------------------------------------------------------------------------------------------------------------------|
|           | <b>If yes, such as:</b>                                                                                                                                                                                                                                                                                                                                                                                    |
| <b>34</b> | <p><b>Do you think your loved one was sufficiently involved in his or her medical treatment?</b></p> <p><input type="checkbox"/> yes</p> <p><input type="checkbox"/> sometimes</p> <p><input type="checkbox"/> no</p> <p><input type="checkbox"/> don't know</p> <p><b>Please explain</b></p>                                                                                                              |
| <b>35</b> | <p><b>Was your loved one able to handle and complete issues with related to his or her imminent death?</b><br/><i>It includes other issues than medical discussions, e.g. doing things from their bucket list, recovering lost contacts, arranging funeral and/or legacy, saying goodbye, etc.</i></p> <p><input type="checkbox"/> yes</p> <p><input type="checkbox"/> no</p> <p><b>Please explain</b></p> |

| Satisfaction with care in the Maastad Hospital (out- and / or inpatient) |                                                           |      |      |      |           |           |      |
|--------------------------------------------------------------------------|-----------------------------------------------------------|------|------|------|-----------|-----------|------|
| How would you rate doctors, in terms of:                                 |                                                           | Poor | Fair | Good | Very good | Excellent |      |
| <b>36</b>                                                                | Their knowledge and experience of your illness?           | 1    | 2    | 3    | 4         | 5         |      |
| <b>37</b>                                                                | The treatment and medical follow-up they provided?        | 1    | 2    | 3    | 4         | 5         |      |
| <b>38</b>                                                                | The attention they paid to your physical problems?        | 1    | 2    | 3    | 4         | 5         |      |
| <b>39</b>                                                                | Their willingness to listen to all of your concerns?      | 1    | 2    | 3    | 4         | 5         |      |
| <b>40</b>                                                                | The interest they showed in you personally?               | 1    | 2    | 3    | 4         | 5         |      |
| <b>41</b>                                                                | The comfort and support they gave you?                    | 1    | 2    | 3    | 4         | 5         |      |
| <b>42</b>                                                                | The information they gave you about your illness?         | 1    | 2    | 3    | 4         | 5         |      |
| <b>43</b>                                                                | The information they gave you about your medical tests?   | 1    | 2    | 3    | 4         | 5         |      |
| <b>44</b>                                                                | The information they gave you about your treatment?       | 1    | 2    | 3    | 4         | 5         |      |
| <b>45</b>                                                                | The frequency of their visits/consultations?              | 1    | 2    | 3    | 4         | 5         |      |
| <b>46</b>                                                                | The time they devoted to you during visits/consultations? | 1    | 2    | 3    | 4         | 5         |      |
| How would you rate nursus (if applicable), in terms of:                  |                                                           | Poor | Fair | Good | Very good | Excellent | N.a. |

|                                                                                      |                                                                                                  |             |             |             |                  |                  |             |
|--------------------------------------------------------------------------------------|--------------------------------------------------------------------------------------------------|-------------|-------------|-------------|------------------|------------------|-------------|
| 47                                                                                   | The way they carried out your physical examination (took your temperature, felt your pulse,...)? | 1           | 2           | 3           | 4                | 5                | N.a         |
| 48                                                                                   | The way they handled your care (gave your medicines, performed intravenous injections,...)?      | 1           | 2           | 3           | 4                | 5                | N.a         |
| 49                                                                                   | The attention they paid to your physical comfort?                                                | 1           | 2           | 3           | 4                | 5                | N.a         |
| 50                                                                                   | The interest they showed in you personally?                                                      | 1           | 2           | 3           | 4                | 5                | N.a         |
| 51                                                                                   | The comfort and support they gave you?                                                           | 1           | 2           | 3           | 4                | 5                | N.a         |
| 52                                                                                   | Their human qualities (politeness, respect, sensitivity, kindness, patience,...)?                | 1           | 2           | 3           | 4                | 5                | N.a         |
| 53                                                                                   | The information they gave you about your medical tests                                           | 1           | 2           | 3           | 4                | 5                | N.a         |
| 54                                                                                   | The information they gave you about your care?                                                   | 1           | 2           | 3           | 4                | 5                | N.a         |
| 55                                                                                   | The information they gave you about your treatment?                                              | 1           | 2           | 3           | 4                | 5                | N.a         |
| 56                                                                                   | Their promptness in answering your buzzer calls?                                                 | 1           | 2           | 3           | 4                | 5                | N.a         |
| 57                                                                                   | The time they devoted to you?                                                                    | 1           | 2           | 3           | 4                | 5                | N.a         |
| <b>How would you rate services and care organisation of the hospital in general?</b> |                                                                                                  |             |             |             |                  |                  |             |
|                                                                                      |                                                                                                  | <b>Poor</b> | <b>Fair</b> | <b>Good</b> | <b>Very good</b> | <b>Excellent</b> | <b>N.a.</b> |
| 58                                                                                   | The exchange of information between caregivers?                                                  | 1           | 2           | 3           | 4                | 5                | N.a         |
| 59                                                                                   | The kindness and helpfulness of the technical, reception, laboratory personnel,...?              | 1           | 2           | 3           | 4                | 5                | N.a         |
| 60                                                                                   | The information provided on your admission to the hospital?                                      | 1           | 2           | 3           | 4                | 5                | N.a         |
| 61                                                                                   | The information provided on your discharge from the hospital?                                    | 1           | 2           | 3           | 4                | 5                | N.a         |
| 62                                                                                   | The waiting time for obtaining results of medical tests?                                         | 1           | 2           | 3           | 4                | 5                | N.a         |
| 63                                                                                   | The speed of implementing medical tests and/or treatments?                                       | 1           | 2           | 3           | 4                | 5                | N.a         |
| 64                                                                                   | The ease of access (parking, means of transport,...)?                                            | 1           | 2           | 3           | 4                | 5                | N.a         |
| 65                                                                                   | The ease of finding ones way to the different departments?                                       | 1           | 2           | 3           | 4                | 5                | N.a.        |
| 66                                                                                   | The environment of the building (cleanness, spaciousness, calmness,...)?                         | 1           | 2           | 3           | 4                | 5                | N.a.        |
| 67                                                                                   | Overall, how would you rate the care received during your hospital stay?                         | 1           | 2           | 3           | 4                | 5                | N.a.        |



| Post-bereavement needs |                                                                                                                                                                                                                                                                                                                                          |
|------------------------|------------------------------------------------------------------------------------------------------------------------------------------------------------------------------------------------------------------------------------------------------------------------------------------------------------------------------------------|
| <b>68</b>              | <p><b>After the death of your loved one, have you spoken with a hospital healthcare professional regarding his/her illness or death? (You can tick multiple boxes)</b></p> <p><input type="checkbox"/> yes, directly after his / her death</p> <p><input type="checkbox"/> yes, after a few weeks</p> <p><input type="checkbox"/> no</p> |
| <b>69</b>              | <p><b>If yes, have these discussion(s) helped you?</b></p> <p><input type="checkbox"/> yes</p> <p><input type="checkbox"/> no</p> <p><input type="checkbox"/> don't know</p> <p><b>Please explain</b></p> <div style="border: 1px solid black; height: 20px; width: 50%; margin-left: 100px;"></div>                                     |
| <b>70</b>              | <p><b>If no, would you have appreciated talking to someone?</b></p> <p><input type="checkbox"/> yes</p> <p><input type="checkbox"/> no</p> <p><input type="checkbox"/> don't know</p>                                                                                                                                                    |
| <b>71</b>              | <p><b>How much effort did it take to detach yourself from thoughts of, or grief over your loved ones and focus on other possible new obligations, activities or contacts?</b></p> <p><input type="checkbox"/> great difficulty</p> <p><input type="checkbox"/> some difficulty</p> <p><input type="checkbox"/> no difficulty</p>         |
| <b>72</b>              | <p><b>Have you received sufficient support from family and friends to cope with the grief and loss of your loved one?</b></p> <p><input type="checkbox"/> yes, amply sufficient</p> <p><input type="checkbox"/> yes, sufficient</p> <p><input type="checkbox"/> no, insufficient</p>                                                     |
| <b>73</b>              | <p><b>If you might have a final remark concerning coping with the loss of your loved one, please explain it below:</b></p> <div style="border: 1px solid black; height: 50px; width: 60%; margin-left: 100px;"></div>                                                                                                                    |
